# Supplementary material for: The C9ORF72 GGGGCC expansion forms RNA G-quadruplex inclusions and sequesters hnRNP H to disrupt splicing in ALS brains
Source: eLife journal article supplement (doi:10.7554/elife.17820), 2016-09-13
Supplement: supp [file elife-17820-supp-v1.zip]

Archive with 15 entries (15 files):
- elife_poa_e17820_Figure_5_figure_supplement_1.pdf
- elife_poa_e17820_Figure_3_figure_supplement_2.pdf
- elife_poa_e17820_Figure_5_figure_supplement_4.pdf
- elife_poa_e17820_Figure_3_figure_supplement_1.pdf
- elife_poa_e17820_Supplementary_File_2.xlsx
- elife_poa_e17820_Figure_5_figure_supplement_2.pdf
- elife_poa_e17820_Supplementary_File_1.xlsx
- elife_poa_e17820_Supplementary_File_4.xlsx
- elife_poa_e17820_Figure_4_figure_supplement_2.pdf
- elife_poa_e17820_Figure_4_figure_supplement_1.pdf
- elife_poa_e17820_Figure_5_figure_supplement_3.pdf
- elife_poa_e17820_Supplementary_File_3.xlsx
- elife_poa_e17820_Figure_1_figure_supplement_1.pdf
- elife_poa_e17820_Figure_2_figure_supplement_1.pdf
- elife_poa_e17820_Figure_6_figure_supplement_1.pdf
