# Supplementary material for: The C9ORF72 GGGGCC expansion forms RNA G-quadruplex inclusions and sequesters hnRNP H to disrupt splicing in ALS brains
Source: eLife journal article supplement (doi:10.7554/elife.17820), 2016-09-13
Supplement: supp [file elife-17820-supp-v1.zip › elife_poa_e17820_Supplementary_File_1.xlsx]

## Sheet: Sheet1
Supp. File 1, Patient and Control Information
nonALS/sALS
	Sex	Age at Death	Disease Duration	Age at skin box	Diagnosis	Region of Onset	C9 repeats	Family history	Astrocyte	Brain Tissue
OS80012	M	n/a	n/a	73	neuro exam normal	n/a	unknown	unknown	n/a	n/a
OS80020	M	n/a	n/a	69	neuro exam normal	n/a	unknown	unknown	n/a	n/a
OS80021	F	n/a	n/a	55	neuro exam normal	n/a	unknown	unknown	n/a	n/a
OS80022	M	n/a	n/a	64	neuro exam normal	n/a	unknown	unknown	n/a	n/a
OS80025	M	n/a	n/a	72	neuro exam normal	n/a	unknown	unknown	n/a	n/a
SPC005	M	85	n/a	No skin	COPD	n/a	unknown	unknown	+	n/a
34	M	60	n/a	No skin	neuro exam normal	n/a	unknown	unknown	n/a	CBL, BA4
23	F	62	n/a	No skin	hypoxic ischemic encephalopathy	n/a	unknown	unknown	n/a	CBL, BA4
59	F	54	n/a	No skin	neuro exam normal	n/a	unknown	unknown	n/a	CBL, BA4
72	M	89	n/a	No skin	neuro exam normal	n/a	unknown	unknown	n/a	CBL, BA4
46	M	84	n/a	No skin	neuro exam normal	n/a	unknown	unknown	n/a	CBL, BA4
04	F	54	n/a	No skin	neuro exam normal	n/a	unknown	unknown	n/a	CBL, BA4, SC
992	F	52	>2 years***	No skin	L144F SOD1 ALS	unknown	unknown	no	n/a	CBL, BA4
78	F	65	n/a	No skin	neuro exam normal	n/a	unknown	unknown	n/a	SC
C9ALS
	Sex	Age at Death	Disease Duration	Age at skin box	Diagnosis	Region of Onset	C9 repeats	Family history	Astrocyte	Brain Tissue
C9001	unknown	61	unknown	61	FTD	unknown	+	no	n/a	n/a
C9003	M	77	17 months	77	ALS/FTD	bulbar	+	ALS	n/a	n/a
C9004	M	unknown	unknown	unknown	FTD	unknown	+	unknown	n/a	n/a
C9005	M	52	57 months	52	ALS/FTD	UE	+	ALS (father)	n/a	n/a
C9007	F	63	22 months	63	ALS	LE	+	ALS	n/a	n/a
C9008	M	62	n/a	62	unaffected carrier	n/a	+	MND, FTD (sister, ie. C9009)	n/a	n/a
C9009= 37	F	65	86 months	65	ALS	UE	+	MND, FTD	n/a	CBL, BA4
99	F	64	15 months	64	ALS, parkinsonism, Sjogren's syndrome	bulbar	+	unknown	n/a	CBL, BA4
14	F	64	<2 years***	64	ALS	LE	+	ALS (father)	n/a	CBL, BA4, SC
96	F	58	20 months	58	ALS	unknown	+	unknown	n/a	CBL, BA4
LLHA002= 25	M	60	8 months (ALS)	60	ALS/FTD	UE	+	ALS, FTD (mother)	+	CBL, BA4
			192 months (FTD)
83	M	73	54 months	n/a	ALS	UE	+	ALS (father) post-polio syndrome (brother)	n/a	CBL, BA4
292	M	59	12 months	59	ALS	lumbosacral	+	MND (paternal uncle and cousin)	n/a	CBL, BA4, SC
Sample quality note: RNA extracted from CBL of 23 was of low quality, and RNA extracted from CBL of 46 was consistently degraded.
