# Supplementary material for: The C9ORF72 GGGGCC expansion forms RNA G-quadruplex inclusions and sequesters hnRNP H to disrupt splicing in ALS brains
Source: eLife journal article supplement (doi:10.7554/elife.17820), 2016-09-13
Supplement: supp [file elife-17820-supp-v1.zip › elife_poa_e17820_Supplementary_File_2.xlsx]

## Sheet: Sheet1
Supp. File 2, Genes Analyzed
Gene Name	Exon Coordinates (GRCh38/hg38)	Mean Inclusion siNC	Mean Inclusion siH	Mean Inclusion Control CBL	Mean Inclusion C9 CBL	Slope
ATXN2	Chr12: 111,453,845-111,453,677	73.7***	46.6***	60.6*	48.9*	1.30*
GABBR1	Chr6: 29,606,372- 29,606,503	99.0***	84.9***	98.9*	92.2*	1.03****
PEX19	Chr1: 160,283,639-160,283,530	92.1***	55.0***	60.3**	36.8**	2.64****
PAN2	Chr12: 56,322,482-56,322,423	58.6**	35.6**	79.4*	68.3*	1.44***
PSMD4	Chr1: 151,262,161-151-262,302	94.2*	91.1*	91.4**	80.1**	1.48****
PPP1R12C	Chr19: 55,094,798-55,094,661	98.7****	85.4****	90.5**	70.7**	2.21****
MTA1	Chr14: 105,449,359- 105,449,410	58.8***	25.8***	94.9*	83.3*	1.57****
DOLPP1	Chr9: 129,086,139- 129,086,267	91.7*	43.8*	73.5**	46.4**	3.74****
KIF1C	Chr17: 5,000,220- 5,000,353	100***	70.2***	99.8*	99.1*	0.08*
DAZAP1	Chr19: 1,425,878- 1,425,960	95.4 n.s.	94.2 n.s.	93.6**	84.8**	1.16****
WDR45	ChrX: 49,077,748- 49,077,643	92.1*	96.3*	86.0**	90.8**	-0.33**
HNRPDL	Chr4: 82,425,667-82,425,563	30****	60.2****	2.2*	16.9*	-2.13****
OS9	Chr12: 57,720,099-57,720,263	25.5**	100**	69.5**	82.0**	-0.94****
PCBP2	Chr12: 53,467,805-53,467,843	83.0****	70.9****	38.7***	18.2***	1.56****
SIGMAR1	Chr9: 34,637,089-34,636,997	97.5*	76.6*	98.1*	95.8*	0.31*
RPL10	ChrX: 154,400,464-154,400,626	95.4****	99.2****	92.6*	94.7*	-0.06 n.s.
RBM38	Chr20: 57,393,279-57,393,333	100****	31.0****	85.3**	71.6**	1.53***
ARRB2	Chr17: 4,718,261- 4,718,345	95.3*	59.0*	78.8 n.s.	67.6 n.s.
PFKM	Chr12: 48,135,291-48,135,384	85.3*	98.6*	96.6 n.s.	98.3 n.s.
RNH1	Chr11: 504,996- 504,824	67.0 n.s.	40.8 n.s.	41.3 n.s.	55.2 n.s.
BAT3	Chr6: 2,981,525- 2,981,379	22.3 n.s.	13.8 n.s.	71.9 n.s.	71.5 n.s.
CABIN1	Chr22: 24,176,111- 24,176,277	99.7**	93.2**	95.5 n.s.	97.2 n.s.
MELK	Chr9: 36,657,241-36,657,363	89.3 n.s.	88.6 n.s.	Not detected	Not detected
KIAA1542	Chr11: 605,605-605,724	86.8*	51.1*	96.6 n.s.	88.7 n.s.
UQCRB	Chr8: 96,231,515- 96,231,379	3.5****	11.6****	0 n.s.	0 n.s.
UBE2I	Chr16: 1,312,347- 1,312,603	5.8****	19.3****	0 n.s.	0 n.s.
TCEB1	Chr8: 73,964,629- 73,964,487	6.4**	15.7**	n/a	n/a
NRCAM	Chr7: 108,225,589- 108,225,645	n/a	n/a	66.7 n.s.	58.5 n.s.
NF1	Chr17: 31,252,938- 31,253,000	n/a	n/a	16.9 n.s.	12.3 n.s.
NEXN	Chr1: 77,925,188- 77,925,229	n/a	n/a	42.0 n.s.	32.0 n.s.
ZCCHC17	Chr1: 31,318,167 -31,318,236	n/a	n/a	7.8*	5.4*
G2AD	Chr14: 23,566,686- 23,566,562	n/a	n/a	75.8 n.s.	60.0 n.s.
USPL1	Chr13: 30,621,073- 30,621,239	n/a	n/a	16.7 n.s.	12.8 n.s.
