# Supplementary material for: The C9ORF72 GGGGCC expansion forms RNA G-quadruplex inclusions and sequesters hnRNP H to disrupt splicing in ALS brains
Source: eLife journal article supplement (doi:10.7554/elife.17820), 2016-09-13
Supplement: supp [file elife-17820-supp-v1.zip › elife_poa_e17820_Supplementary_File_3.xlsx]

## Sheet: Sheet1
Supp. File 3: Template, siRNA, and Primer sequences
Type	Name/Gene	Sequence (5'-3')
siRNA	Negative control (siNC)	UUCUCCGAACGUGUCACGUTT
		ACGUGACACGUUCGGAGAATT
	hnRNP H (siH)	Phosphate-AACUUGAAUCAGAAGAUGAAGUCAA
		UUGACUUCAUCUUCUGAUUCAAGUUCA
T7 template	10R (duplex)	TAATACGACTCACTATA(GGGGCC)10
		(GGCCCC)10TATAGTGAGTCGTATTA
	4R (duplex)	TAATACGACTCACTATA(GGGG)4
		(GGCCCC)4TATAGTGGAGTCGTATTA
primer (cloning)	hnRNP H1 BamHI F	ATATATTTGGATCCGACCTATGATGTTGGGCACGGAAGGTGGAGA
	hnRNP H1 HindIII R	CGGGGATCAAGCTTCTATGCAATGTTTGATTGAAAATCAC
primer (rt-PCR)	ATXN2 F	CCATCCTTCTCACGTTCAGCC
	ATXN2 R	AGGAGGGAATTTGGCCTTTCG
	GABBR1 F	ATGTCCTCACTCTCGCCATC
	GABBR1 R	GCAGCCCCTTGTAACCATAG
	PEX19 F	TGAGGAAGGCTGTAGTGTCGG
	PEX19 R	TCTCTTGGGAAGCGAAGAGGG
	PAN2 F	CCTGTTCCATATGCCCCGAAA
	PAN2 R	GCCAGCACTGAGGAGAAGACA
	PSMD4 F	GGTGTTGGAAAGCACTATGGT
	PSMD4 R	GAGTGTGGTCAGCACTTCACA
	PPP1R12C F	CTGAGCCTGTTGGAGGAACTG
	PPP1R12C R	GACTGCTCAGACGACACACAG
	DOLPP1 F	CTGTGGCCTTCCTAGTCTCCT
	DOLPP1 R	TGGGAATGAGGCTTGTGTCTC
	MTA1 F	AAAGTGGTGTGCTTCTACCGG
	MTA1 R	TTCTCGGGCAGGTCCACCATT
	ARRB2 F	CCTCGAGGCTTCCCTGGACAA
	ARRB2 R	AAGAGGCAGATGTCGGCGTAC
	KIF1C F	GGTGGCAGCCAGAACTGATAC
	KIF1C R	AAAGGTGAAGCTTTTGGGGGC
	WDR45 F	CAGGTGTGCGCATCTACAAC
	WDR45 R	ACAGAAAGCACTGGCTTGGT
	BAT3 F	TCAGTGGTATGCCTGCCAAGA
	BAT3 R	TGGGGTCTTCCTGCAGTCGTT
	RNH1 F	TTCAACCCGTTCTGCTGGCTC
	RNH1 R	CTGGATGTCCAGGCTCATGGT
	CABIN1 F	TTCCACCCTGGACCAGTCCAA
	CABIN1 R	GTCTCACTCGCAGCCTCCTGA
	PFKM F	CATCATCATTGTGGCTGAGG
	PFKM R	CACCTGGACACATTCCATGA
	MELK F	ATGATCACCTCACGGCTACC
	MELK R	TGCAGGTGTTCTGCATAAGG
	DAZAP1 F	TGATCTATGACGCCGAGAAGC
	DAZAP1 R	CCCGAGGCTCAGCTCGTTTAA
	KIAA1542 F	TATGAGCTGGATCCCTTCGAC
	KIAA1542 R	CCTCCTCCAAGTCTGGCTCTG
	HNRPDL F	GGGGTGGCAATCACCAAAACA
	HNRPDL R	TCAATGTCGTCCTGCAAGATGG
	OS9 F	CCAAAAAGCCTCCCCCATCAC
	OS9 R	TGGGCGGACAATTTTGATCTCA
	RPL10 F	CCGCATCAACAAGATGTTGTCCT
	RPL10 R	ACTTGGTGAAGCCCCACTTCT
	PCBP2 F	TTTCCCATGACGCATGGCAAC
	PCBP2 R	CGTTTGGAATGGTGAGTTCATGAGA
	SIGMAR1 F	AGTATGTGCTGCTCTTCGGCA
	SIGMAR1 R	CACCATCCATGTGTTTGGCCC
	RBM38 F	AGCTGAGAGGGCTTGCAAAGA
	RBM38 R	TGGTGGGTAGATGTAGTGCGG
	UQCRB F	AAGAGGGCACTGGACCTGAAC
	UQCRB R	CCCGAATAACCTCTTTCAGATACGG
	UBE2I F	GGAGGGAAGTCCCGAGACAAA
	UBE2I R	TTTCCTCTCCTGGGCGAGTCT
	TCEB1 F	ACCTGGAGACCTAAATGATGAGGA
	TCEB1 R	ACTTTGCTTCCCCAGGAACTTT
Huelga et al. 2012	NRCAM F	TCAAACCATACAGCAGAAGCA
	NRCAM R	ACTTGCATTGCCTTCTGGAG
	NF1 F	CGAAGTGTGTGCCACTGTTT
	NF1 R	GGTGAGACAATGGCAGGATT
	NEXN F	AACGCAGAATTGAGCAGGAT
	NEXN R	TCCTTGAGAGATGGTCGTTG
	ZCCHC17 F	AAGGCCTGAGACCATGGAA
	ZCCHC17 R	GCCCCATAGTCTGTCACCAT
	G2AD F	AGCTGGCCAAACTGCTCTAC
	G2AD R	CAGGTCTCGGCACATCTCA
	USPL1 F	ACGTTGCAACTAGGGTGGAG
	USPL1 R	CAAGCAGGGCAATACTCATCT
