# Supplementary material for: The C9ORF72 GGGGCC expansion forms RNA G-quadruplex inclusions and sequesters hnRNP H to disrupt splicing in ALS brains
Source: eLife journal article supplement (doi:10.7554/elife.17820), 2016-09-13
Supplement: supp [file elife-17820-supp-v1.zip › elife_poa_e17820_Supplementary_File_4.xlsx]

## Sheet: Sheet1
Supp. File 4 Growth Medium Components
Medium type	Component
Fibroblast culture medium	DMEM
	FBS
	Pen/Strep
Dissociation medium	HBSS
	0.25% trypsin
	DNase I
Human astrocytes culture medium	DMEM
	F10
	FBS
	Pen/Strep
ZY Medium	1% (w/v) N-Z amine AS
	.5% (w/v) Yeast Extract
50X 5052	25% (w/v) glycerol
	2.5% (w/v) glucose
	10% (w/v) α-lactose
50X M	1.25 M KH2PO4
	2.5 M NH4Cl
	0.25 M Na2SO4
1000X Metals Mix	50 mM FeCl3.6H2O (dissolved in 0.1M HCl)
	20 mM CaCl2
	10 mM MnCl2.4H2O
	10 mM ZnSO4.7H2O
	2 mM CoCl2.6H2O
	2 mM CuCl2.2H2O
	2 mM NiCl2.6H2O
	2 mM Na2MoO4.2H2O
	2 mM Na2SeO3.5H2O
	2 mM H3BO3
Auto-induction Medium	ZY Medium
	2 mM MgSO4
	.2X Metals Mix
	1 X 5052
	1 X M
	50 ug/mL Kanamycin
