# Supplementary figures and images for: The C9ORF72 GGGGCC expansion forms RNA G-quadruplex inclusions and sequesters hnRNP H to disrupt splicing in ALS brains
Source: eLife journal article supplement (doi:10.7554/elife.17820), 2016-09-13

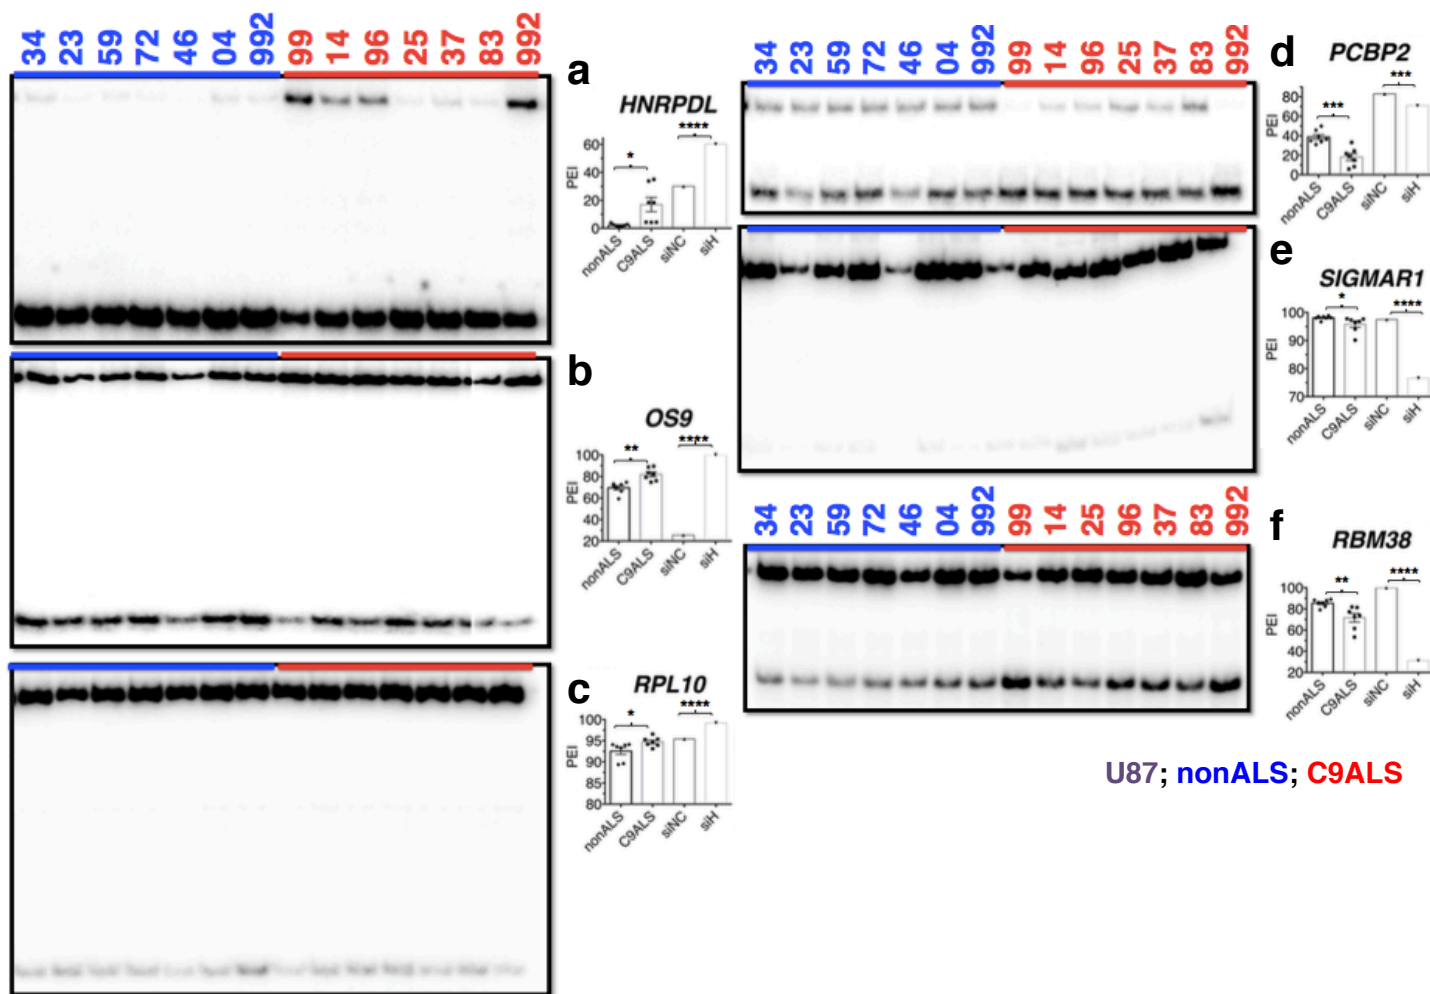

Figure 5- figure supplement 2

Supplement: supp [file elife-17820-supp-v1.zip]

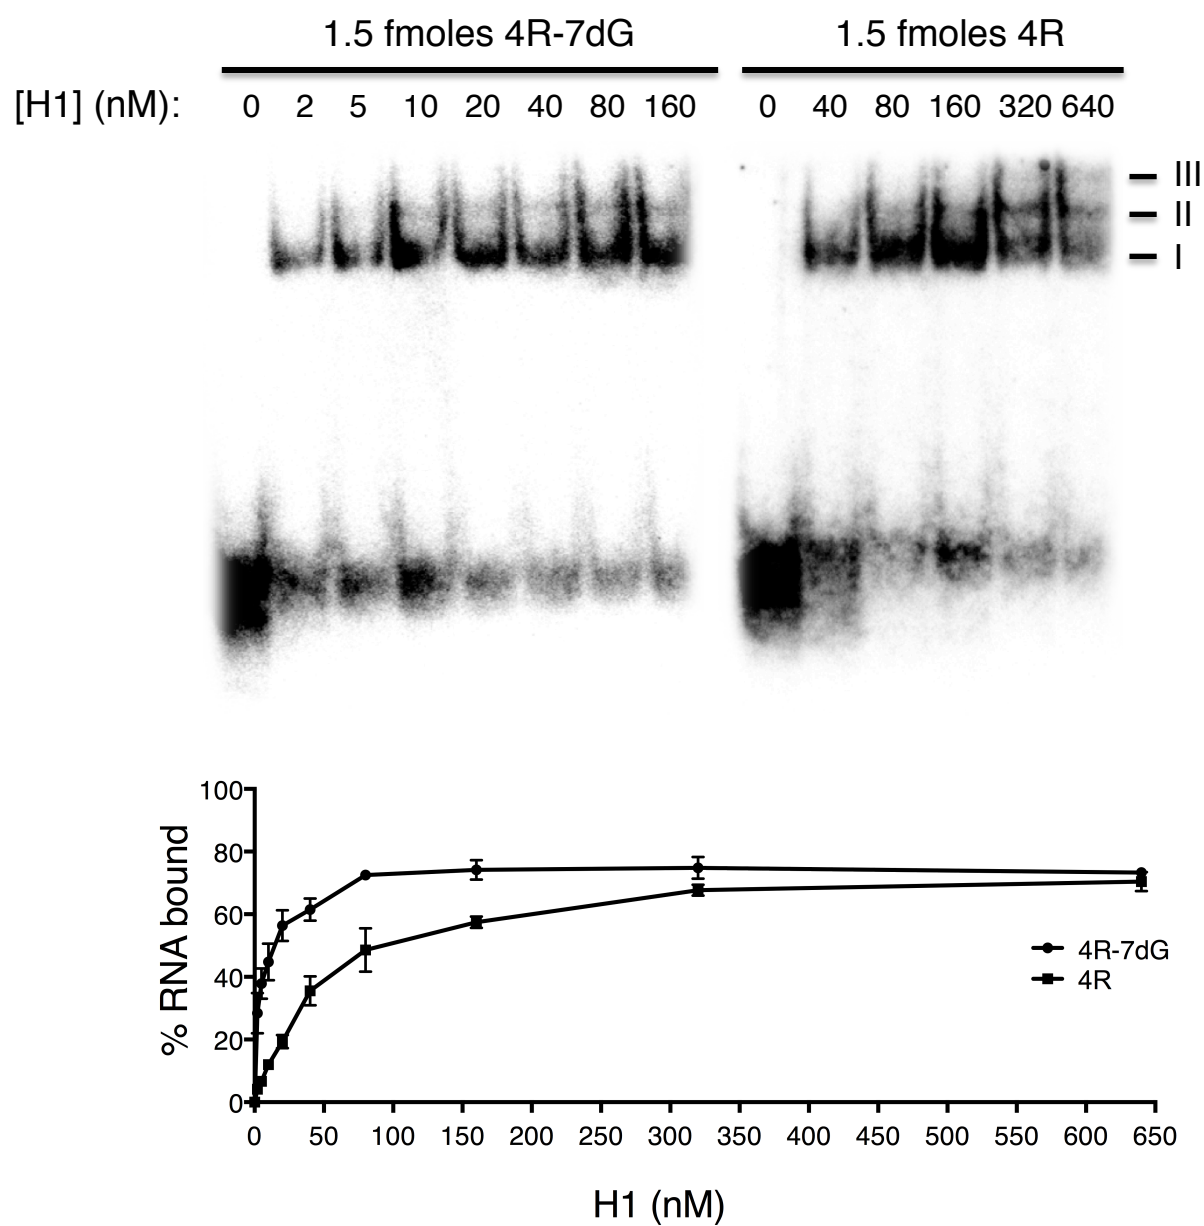

Figure 2- figure supplement 1

Supplement: supp [file elife-17820-supp-v1.zip]

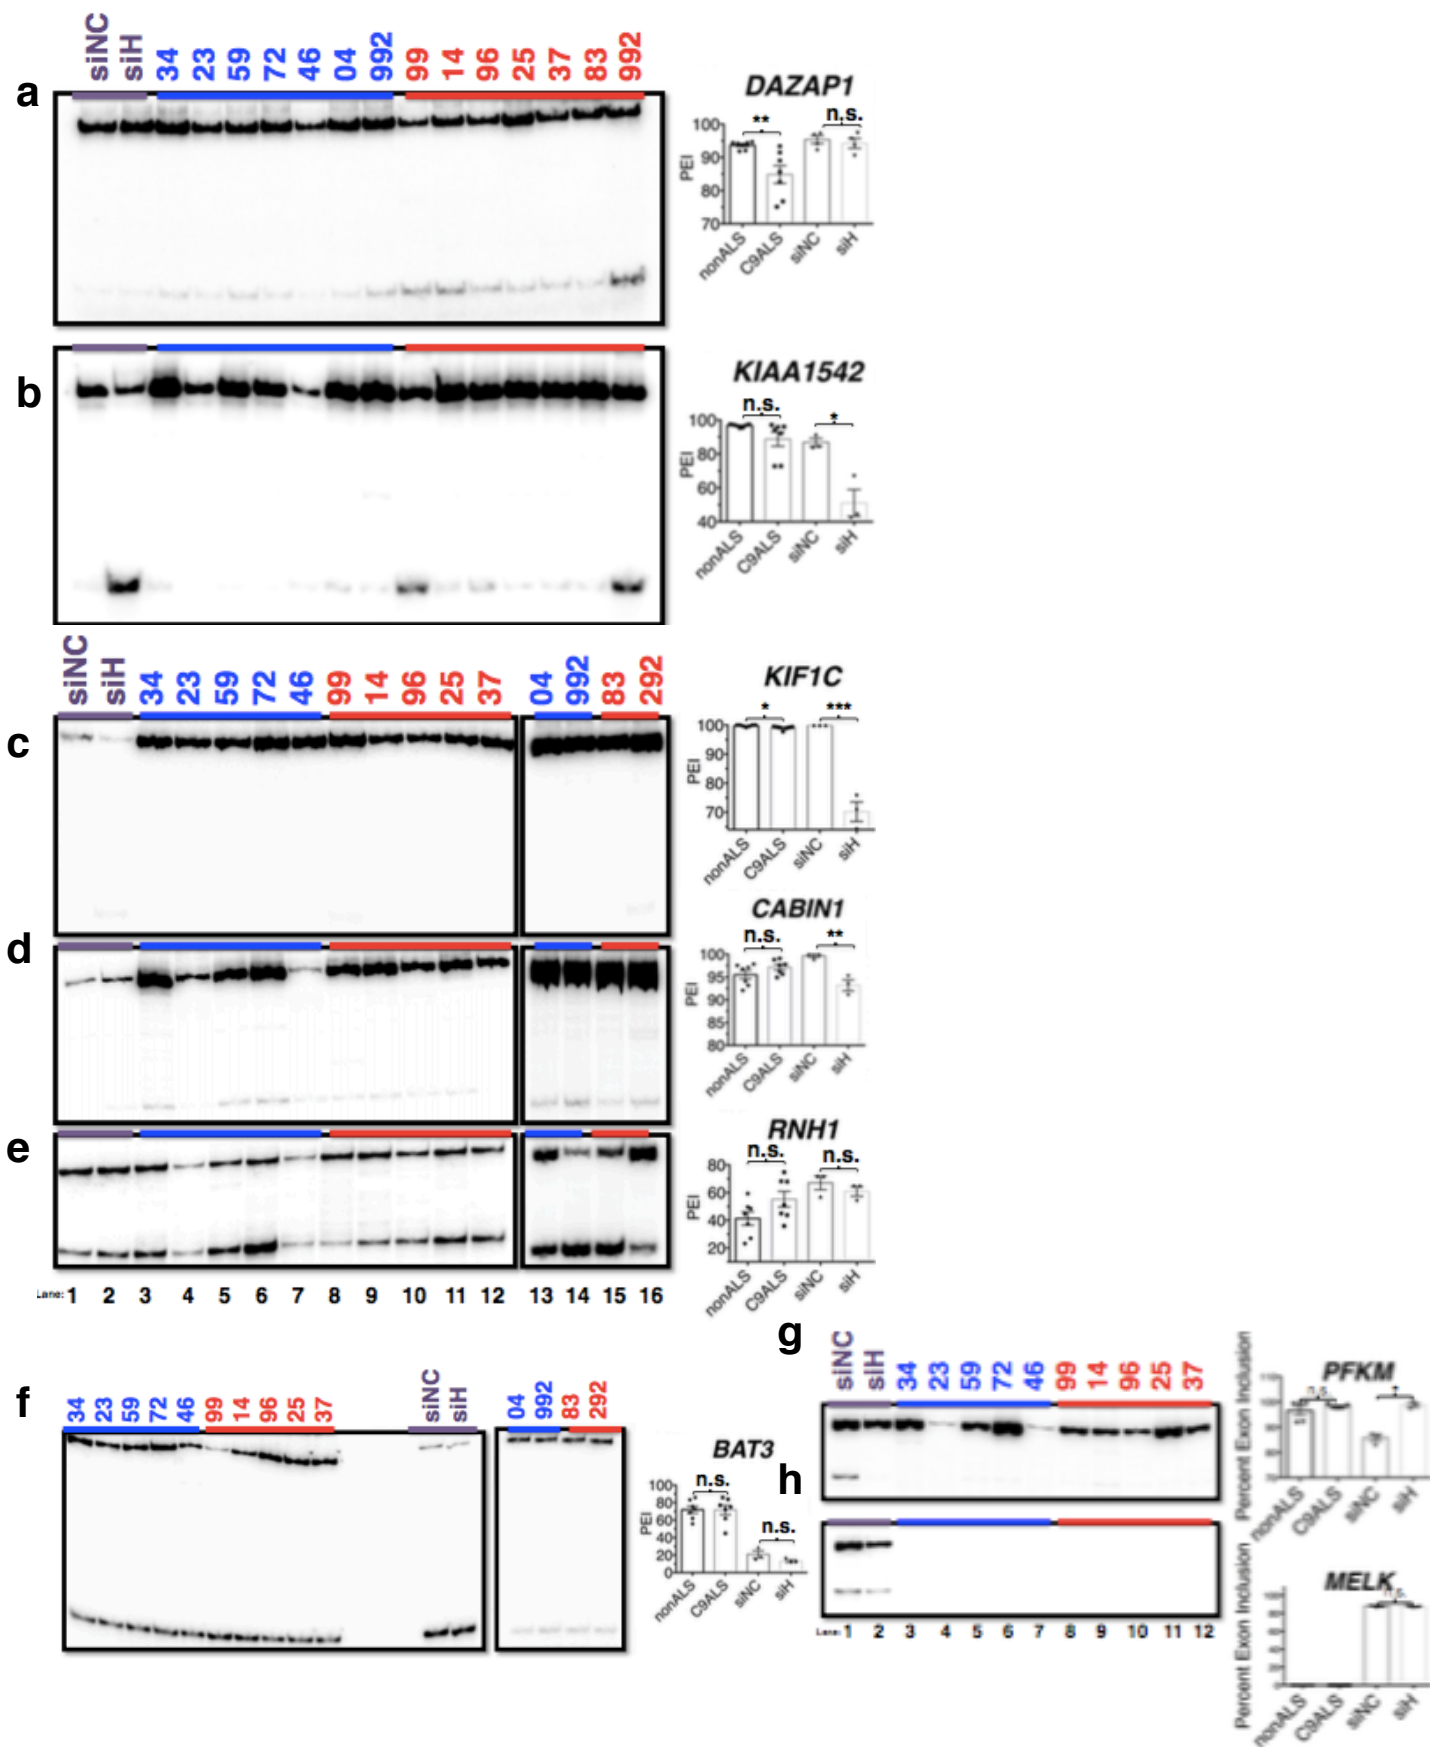

U87; nonALS; C9ALS

Figure 5- figure supplement 1

Supplement: supp [file elife-17820-supp-v1.zip]

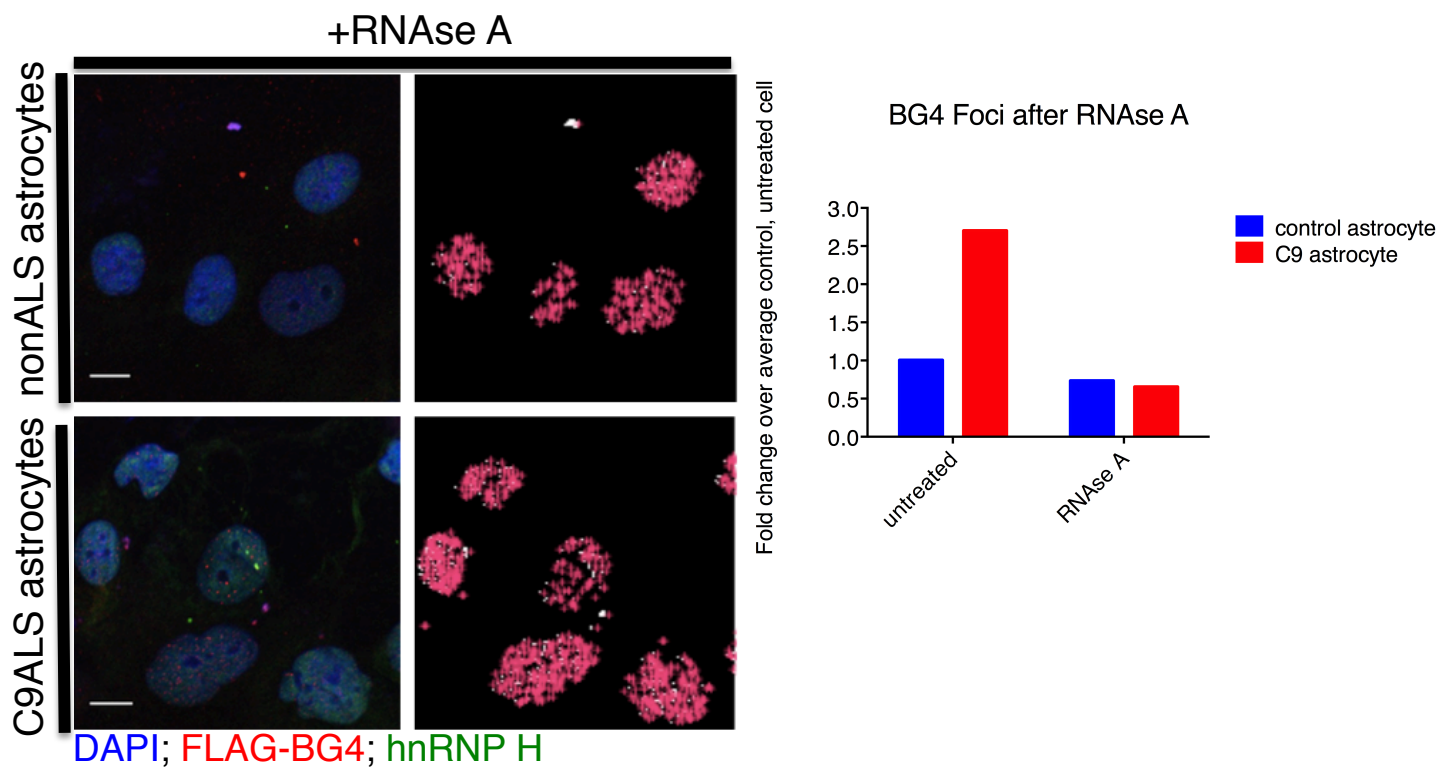

Figure 3- figure supplement 2

Supplement: supp [file elife-17820-supp-v1.zip]

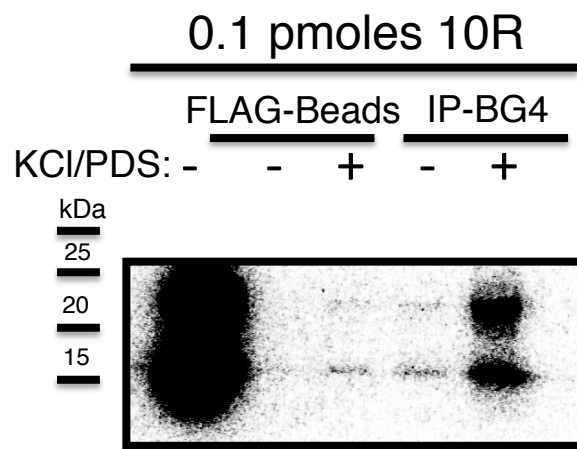

Figure 1- figure supplement 1

Supplement: supp [file elife-17820-supp-v1.zip]

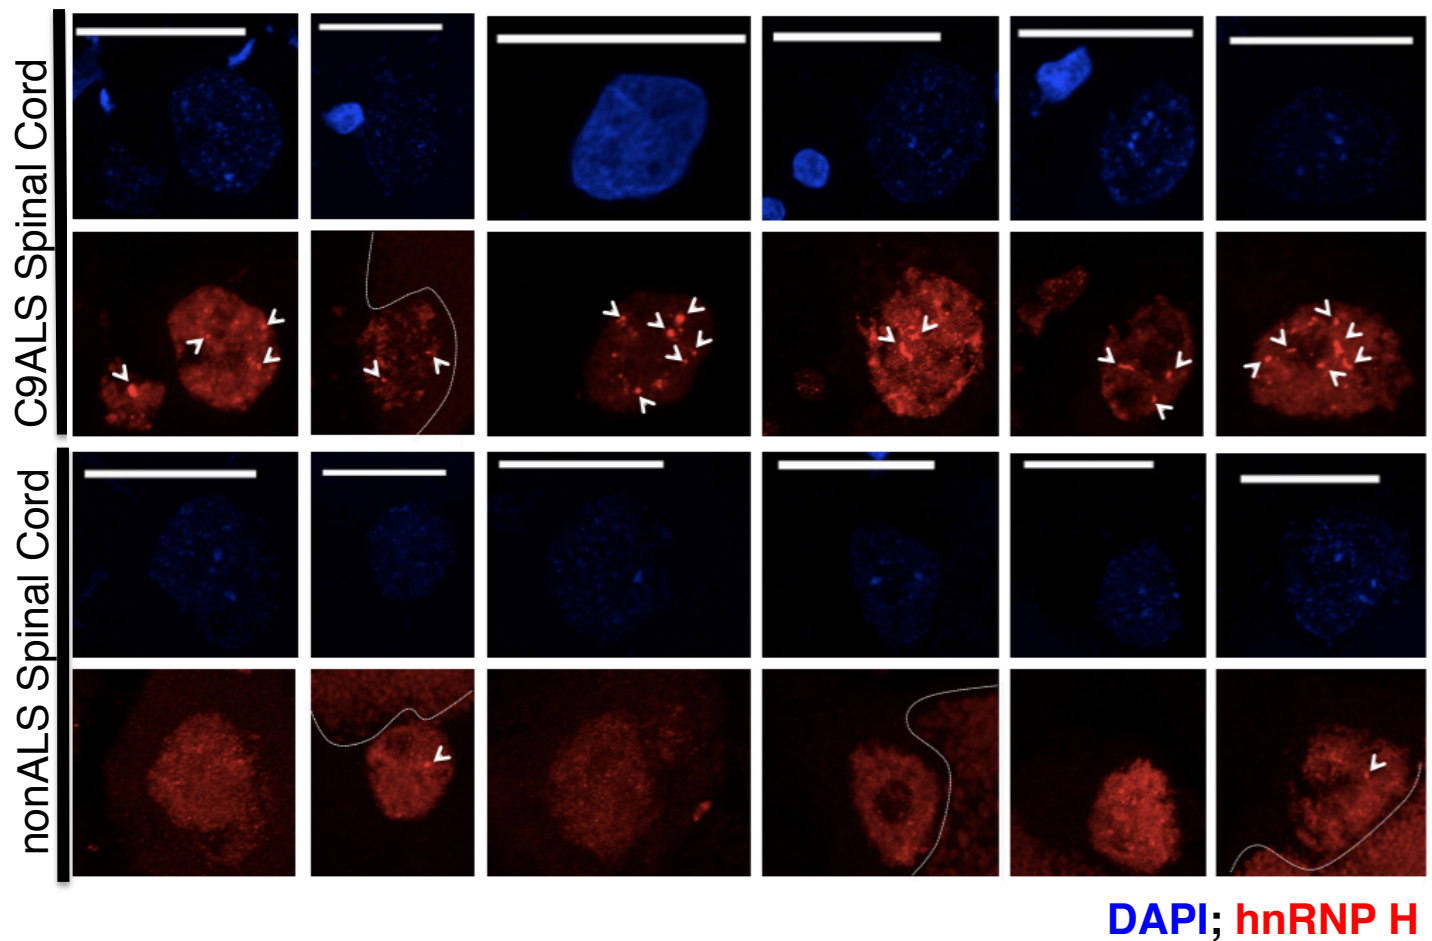

| Patient | # MNs | hnRNP H foci | Ave. foci size (microns) |
|---------|-------|--------------|--------------------------|
| 04      | 9     | 1            | 0.9                      |
| 78      | 10    | 2            | 0.7                      |
| 14      | 12    | 6            | 1.5                      |
| 292     | 24    | 40           | 1.1                      |

Figure 4- figure supplement 2

Supplement: supp [file elife-17820-supp-v1.zip]

**a** hnRNP A1 targets:

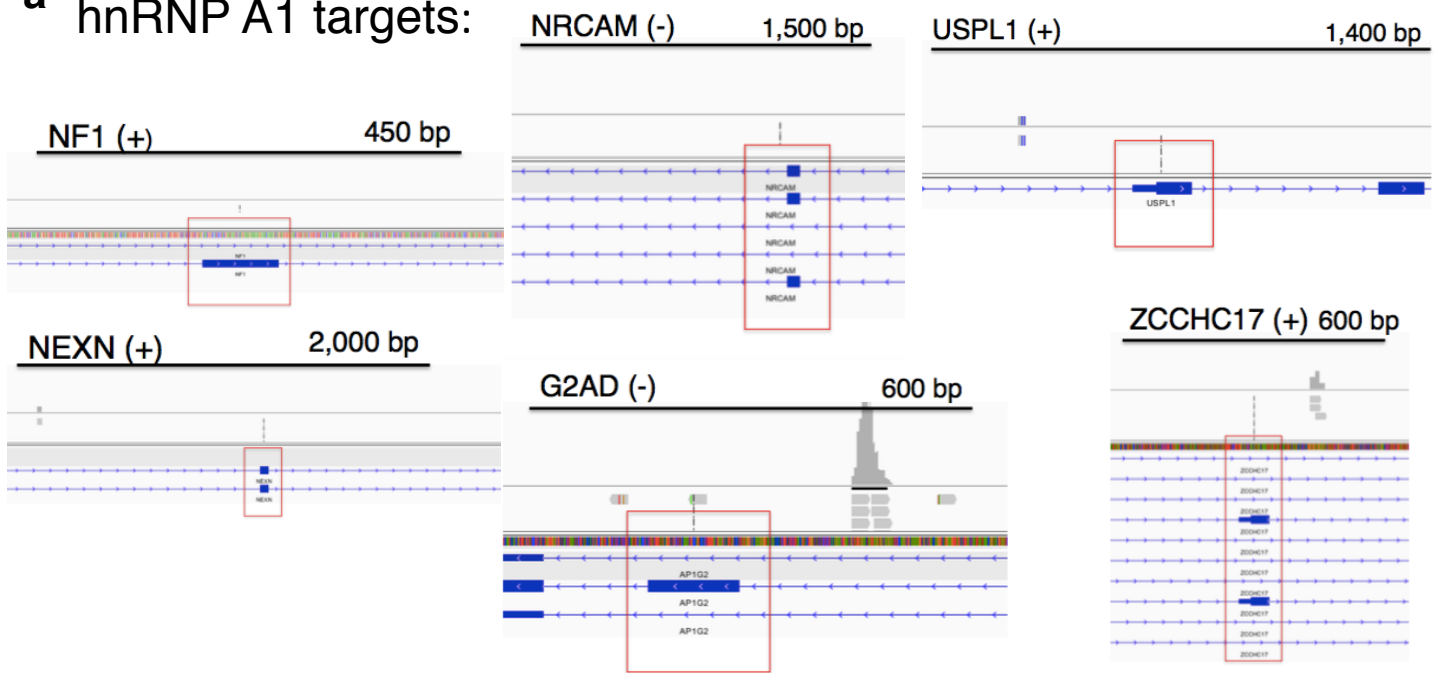

**b** hnRNP H targets:

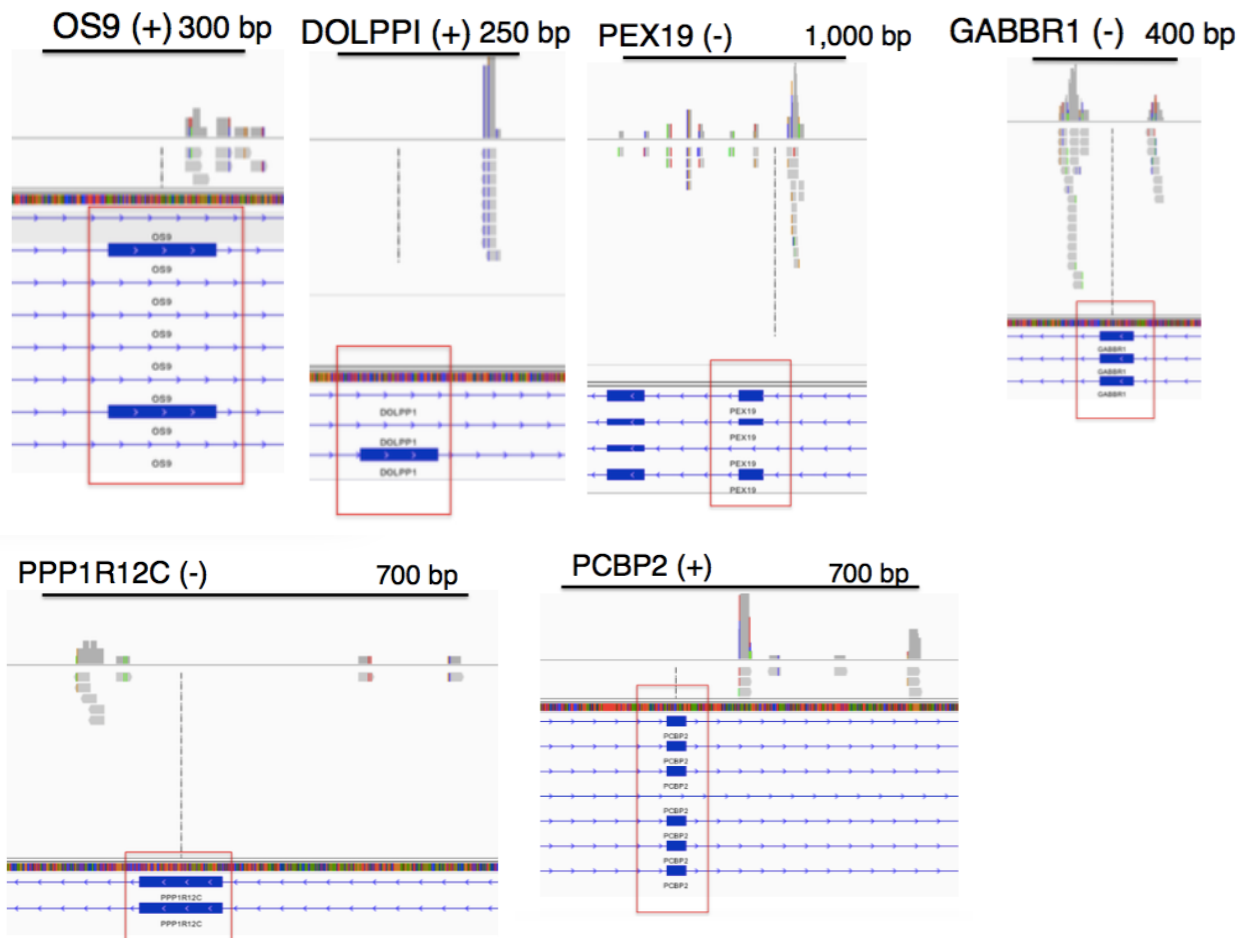

Figure 5- figure supplement 4

Supplement: supp [file elife-17820-supp-v1.zip › elife_poa_e17820_Figure_5_figure_supplement_4.pdf]

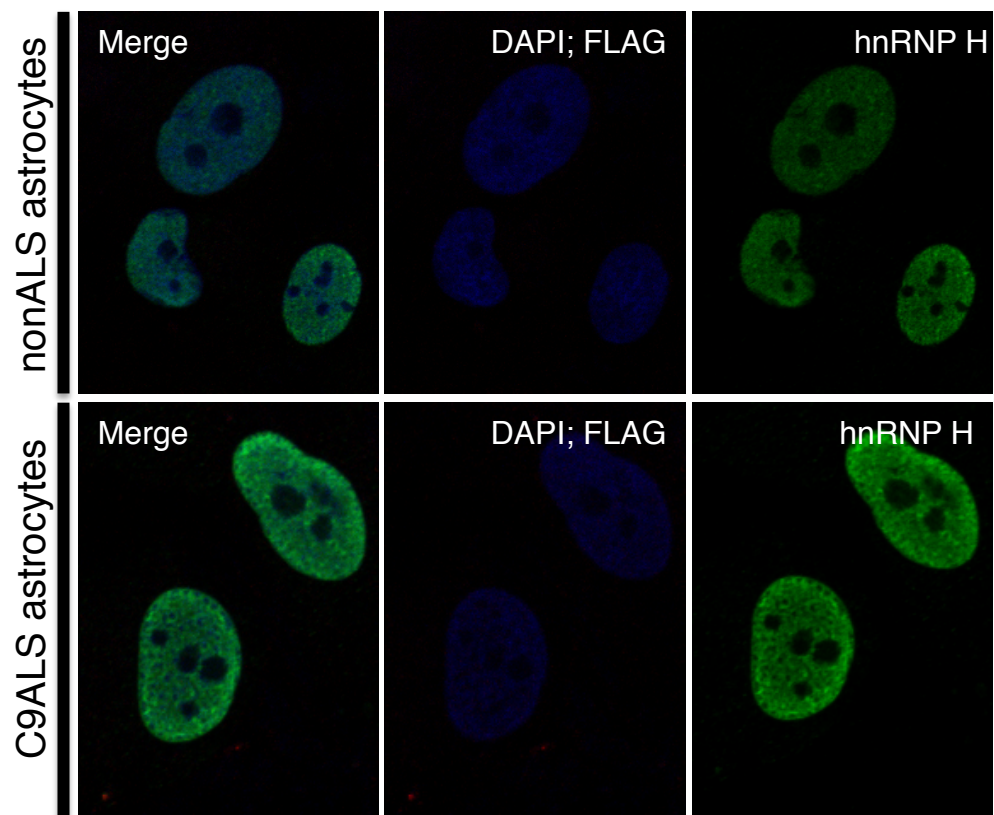

DAPI; FLAG-BG4; hnRNP H

Figure 3- figure supplement 1

Supplement: supp [file elife-17820-supp-v1.zip › elife_poa_e17820_Figure_3_figure_supplement_1.pdf]

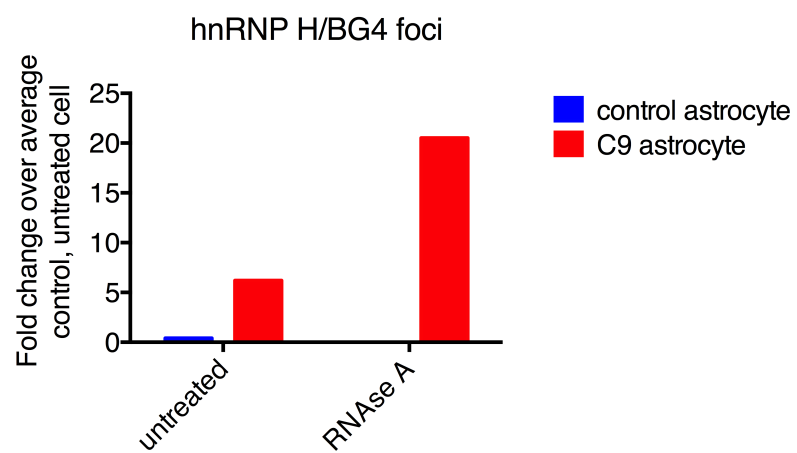

Figure 4- figure supplement 1

Supplement: supp [file elife-17820-supp-v1.zip › elife_poa_e17820_Figure_4_figure_supplement_1.pdf]

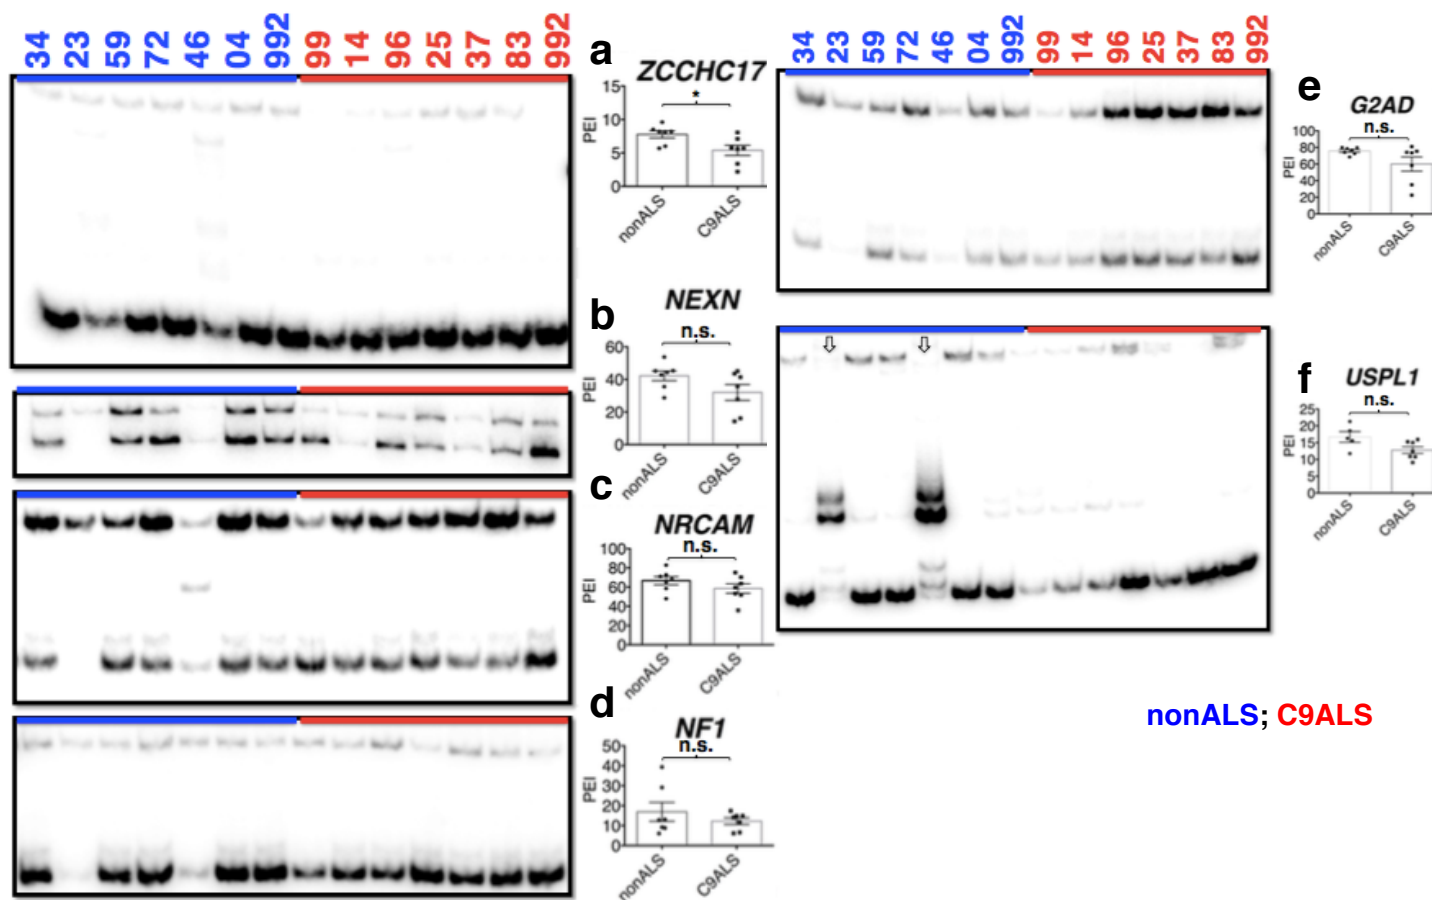

Figure 5- figure supplement 3

Supplement: supp [file elife-17820-supp-v1.zip › elife_poa_e17820_Figure_5_figure_supplement_3.pdf]

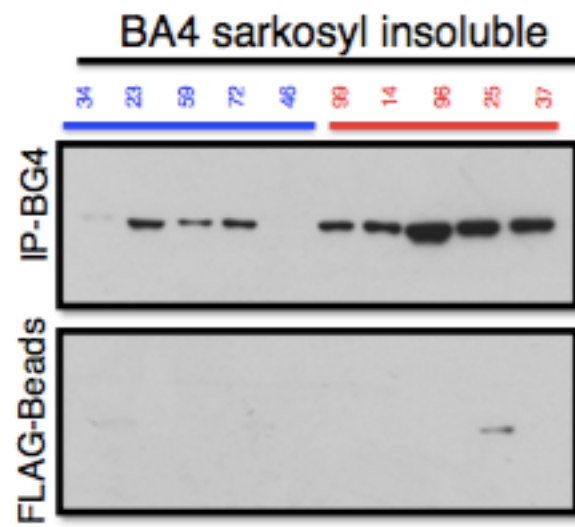

Figure 6- figure supplement 1

Supplement: supp [file elife-17820-supp-v1.zip › elife_poa_e17820_Figure_6_figure_supplement_1.pdf]

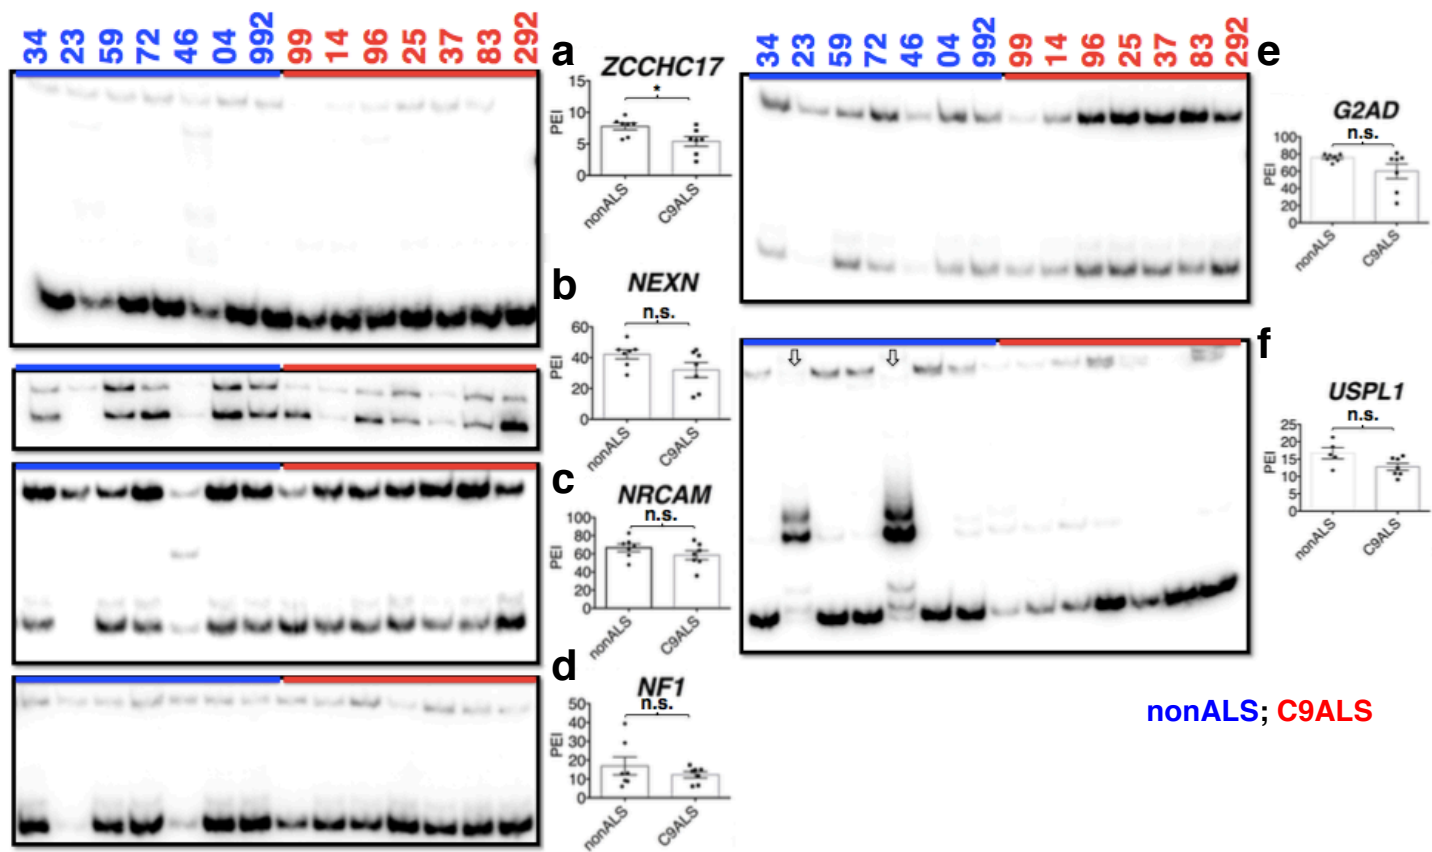

Figure 5- figure supplement 3

Supplement: supp [file elife-17820-supp-v3.zip]

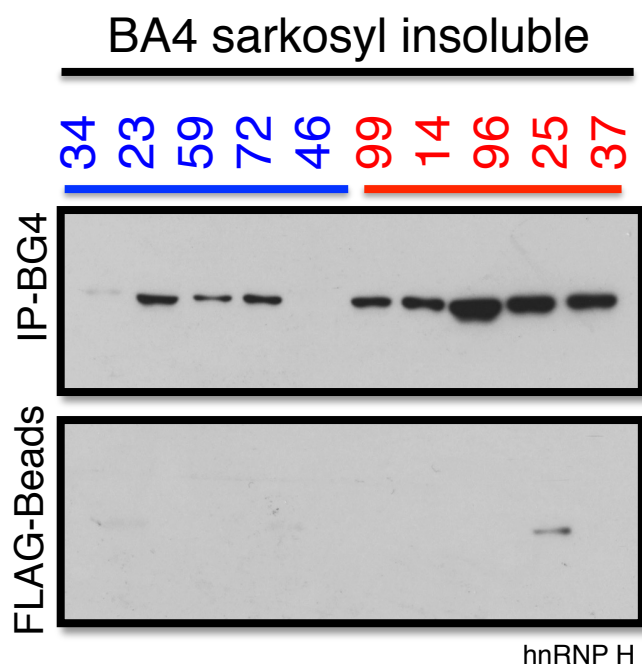

Figure 6- figure supplement 1

Supplement: supp [file elife-17820-supp-v3.zip]

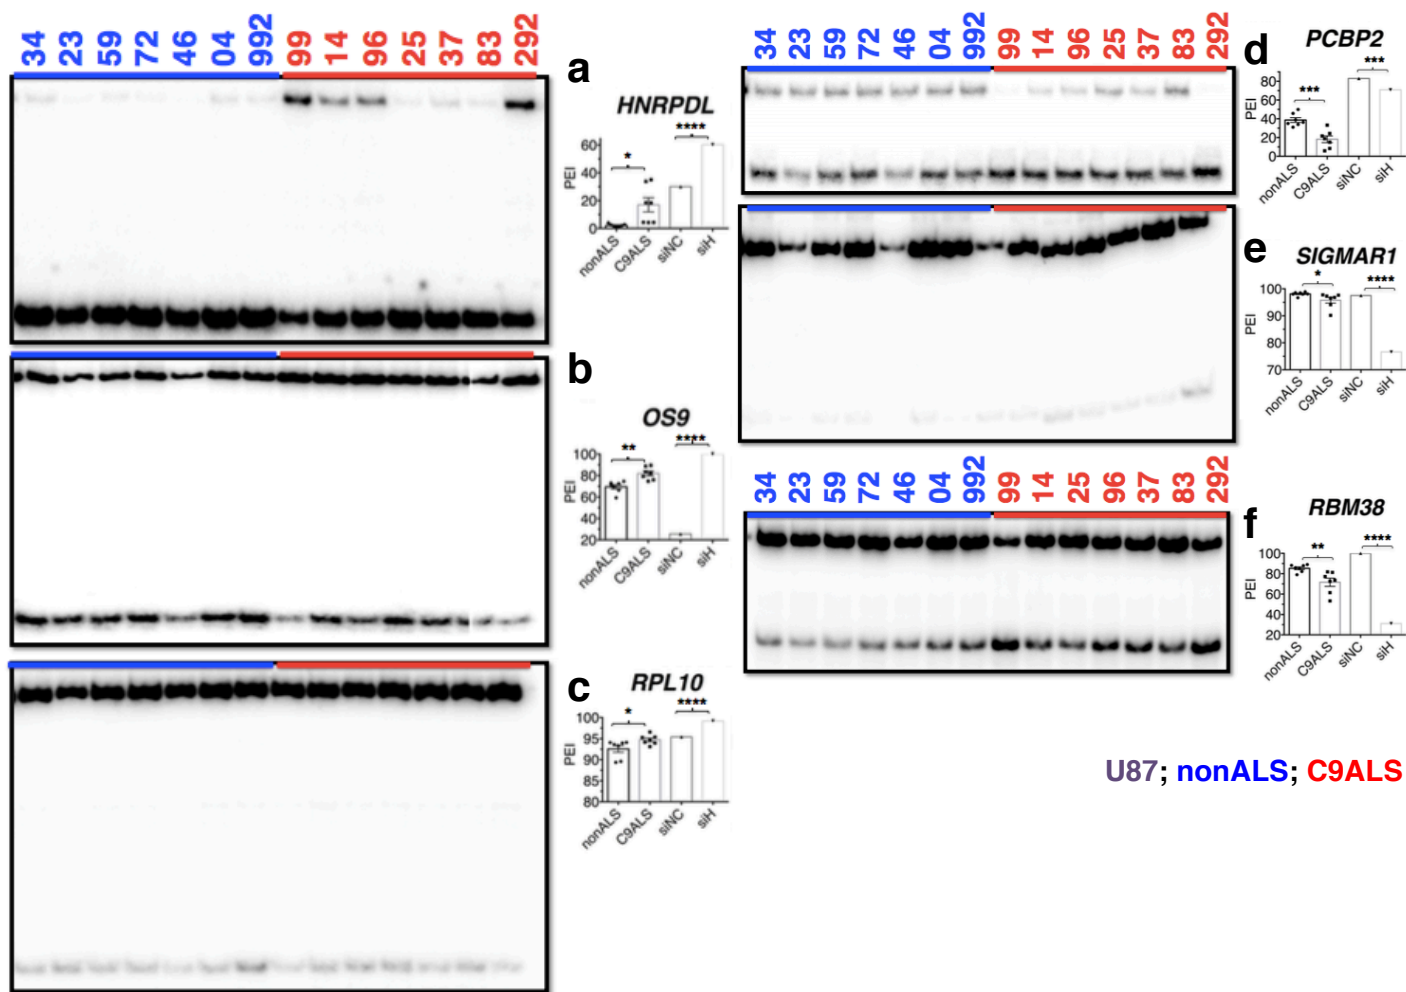

Figure 5- figure supplement 2

Supplement: supp [file elife-17820-supp-v3.zip]

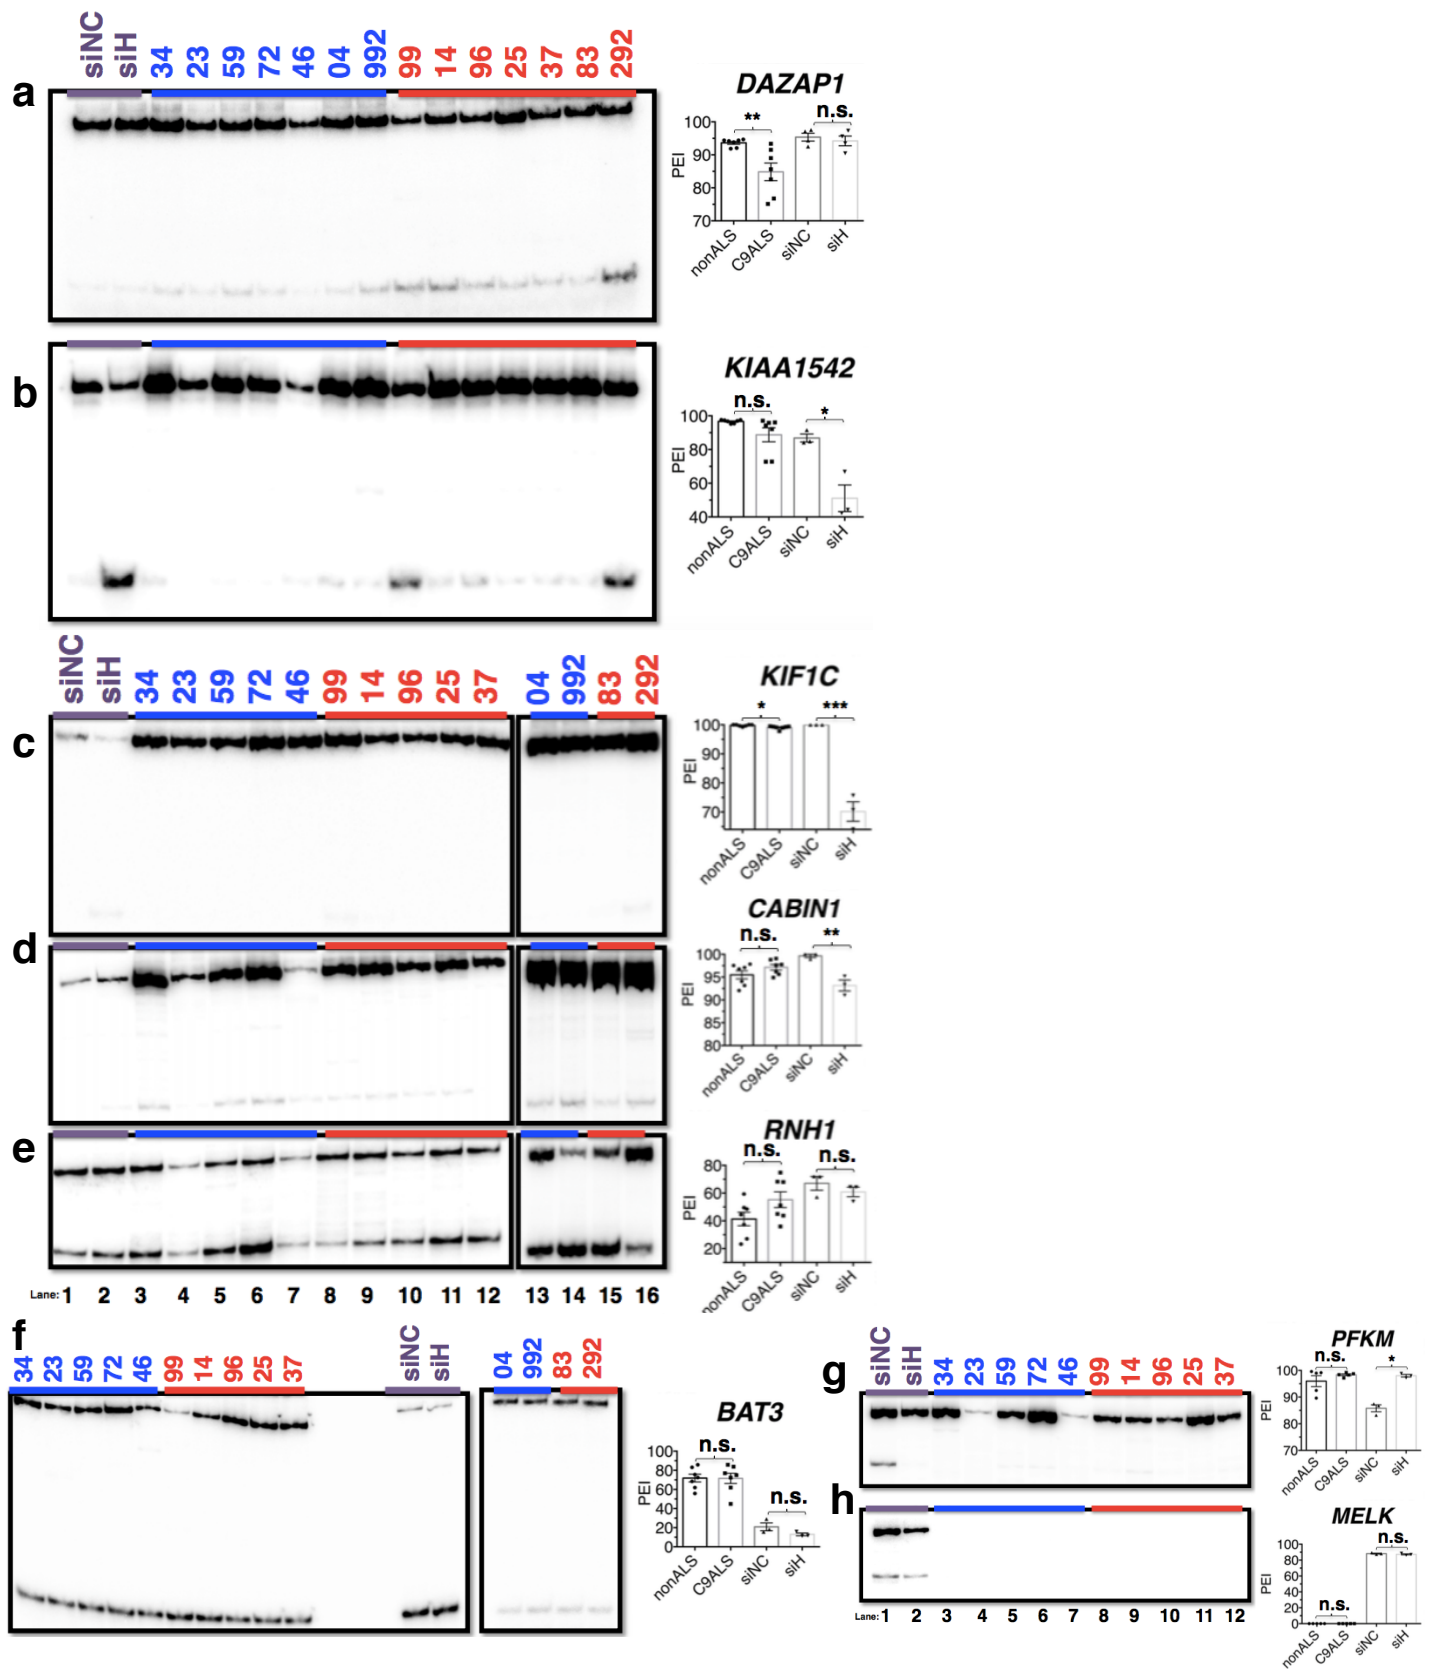

U87; nonALS; C9ALS

Figure 5- figure supplement 1

Supplement: supp [file elife-17820-supp-v3.zip › elife_poa_e17820_Figure_5_figure_supplement_1.pdf]
